# Supplementary material
Source: PubMed Central journal article supplement (PMC2609954)
Supplement: NIHMS64302-supplement-01.pdf [file NIHMS64302-supplement-01.pdf]

**Supplemental table 1. Sequences of primers used for genotyping in stage II**

| SNP        | Amplification primers(5' to 3')                               | Allele-specific probes                  |
|------------|---------------------------------------------------------------|-----------------------------------------|
| rs7134069  | F GAGCCCAGGAATTC AAGATCAG<br>R CCATCATACCTGGCTAATTTTTGTATT    | TGGGCAACATGGCAA<br>TGGGCAACCTGGCAA      |
| rs2859398  | F GAACCCAGGAGGCAAAGCTT<br>R GACGGAGTCTCGCTGGAGTT              | AGCCAAGATTGCACC<br>AGCCAAGACTGCACC      |
| rs2859394  | F TGGAGACAAACAACAATAGGATAAATAG<br>R TTCTCTTGCTTTGTTTTCTGCTTAG | AGAAGACGGTGATAAGT<br>AGAAGATGGTGATAAGTG |
| rs10849833 | F TCACTTGAGGCCAGGAGTTCA<br>R GGACTAAGCCCTGGAGCACTT            | AGCTGGACACCTGCAA<br>AGCTGGACGCCTGC      |
| rs12315068 | F CACGGGTTCAAGCGATTCTC<br>R CCCCGTCTCTACTAAAATACAAAAA         | ACGCCCGGCTAAT<br>ACGCCCAGCTAATT         |
| rs28360476 | F AACAGCTCAGAAACGCCACC<br>R CATGGCAGTGGGCCTCAG                | CGTGCCATTCCCGAA<br>CGTGCCATTACCGAA      |
| rs3213546  | F CCTACAGAGCCCTGGGTAAGG<br>R GGCCATGAGTAAAGGTGAGACACT         | CACCCCAGGAGACT<br>CACCCCAGCAGACT        |
| rs10849829 | F TGCAGCATGTAGTTTTACTTCAA<br>R CGCTGGCGTGCTTACTCA             | CACTGGCCCCTGTT<br>CACTGGTCCCTGTTG       |
| rs7969180  | F TCCAGGAGCAGGTCCATCAC<br>R ATGGGTAAGTGAAGAAGACGAGAATTT       | AGTGGTGAAGCCTT<br>AGTGGTGAACCTT         |
| rs11307154 | F TTTTCCCATGCTAGCTCCTACAA<br>R TTGGCCTTCTTGCTCTCTGAA          | AGCACTGAAATGGT<br>AGCACTGAATGGTC        |
| rs3861793  | F CAGCTTCATCCTGGGTCTGAAG<br>R TCACTGTCTTGGATGCCATAGATC        | AGCAGCTGGAATTC<br>AGCAGCTCGAATTC        |
| rs12819210 | F GCTGGAAACAGAGCCTCTCCT<br>R AGGACTGGTTGGGTCTGGG              | TCTTCTTCGAGAGGAT<br>CTTCTTTGAGAGGATG    |
| rs2259697  | F CGCTTGAGCCGAGGAGTTC<br>R ACCACACCCAGTGAATTATTTTTTTA         | TGGGTATCACAGGGAGA<br>TGGGTATCATAGGGAGAC |
| rs7134141  | F AGGCACTTTTTCTGTCCCTGAA<br>R CCTCTGGTCAATTTAGCAATCATAATC     | CAAACAGAGGTGGGAGA<br>CAAACAGAAGTGGGAGAT |

Supplemental table 2. Allele frequency of association analysis of SVR and selected SNPs in stage I

| SNP                  | location<br>in Chr. | Variant<br>allele | African American(n=180) |                         |              | Variant<br>allele | Caucasian American(n=194) |                        |              |
|----------------------|---------------------|-------------------|-------------------------|-------------------------|--------------|-------------------|---------------------------|------------------------|--------------|
|                      |                     |                   | SVR(n=49)% <sup>#</sup> | NR(n=131)% <sup>#</sup> | p-<br>value* |                   | SVR(n=104)% <sup>#</sup>  | NR(n=90)% <sup>#</sup> | p-<br>value* |
| <b>Chr. 1: G1P2</b>  |                     |                   |                         |                         |              |                   |                           |                        |              |
| rs1921               | 3229102             | A                 | 40.8                    | 42.8                    | 0.74         | A                 | 37.4                      | 40.6                   | 0.52         |
| rs9331223            | 3230171             | C                 | 32.3                    | 30                      | 0.6          | T                 | 41.3                      | 43.9                   | 0.6          |
| <b>Chr. 1: G1P3</b>  |                     |                   |                         |                         |              |                   |                           |                        |              |
| rs11247653           | 27594308            | G                 | 7.1                     | 11.8                    | 0.2          | G                 | 43.2                      | 46.7                   | 0.57         |
| rs1141746            | 27677011            |                   |                         |                         |              |                   |                           |                        |              |
| rs1316896            | 27680244            |                   |                         |                         |              |                   |                           |                        |              |
| <b>Chr. 2: STAT1</b> |                     |                   |                         |                         |              |                   |                           |                        |              |
| rs3088307            | 1.92E+08            | C                 | 24.5                    | 26                      | 0.78         | C                 | 44.2                      | 51.1                   | 0.17         |
| rs1400657            | 1.92E+08            | C                 | 26.5                    | 20.2                    | 0.2          | C                 | 11.7                      | 7.2                    | 0.14         |
| rs1914408            | 1.92E+08            | A                 | 14.3                    | 17.6                    | 0.46         | A                 | 20.6                      | 19.4                   | 0.78         |
| rs2280234            | 1.92E+08            | C                 | 36.7                    | 38.6                    | 0.75         | T                 | 40.3                      | 29.4                   | 0.03         |
| rs2066797            | 1.92E+08            | G                 | 13.3                    | 19.1                    | 0.2          | G                 | 7.8                       | 5.1                    | 0.28         |
| rs12693590           | 1.92E+08            | C                 | 18.4                    | 9.9                     | 0.03         | C                 | 7.3                       | 7.8                    | 0.85         |
| rs2066802            | 1.92E+08            | C                 | 7.1                     | 7.6                     | 0.88         | C                 | 6.3                       | 6.7                    | 0.89         |
| rs1467199            | 1.92E+08            | G                 | 31.6                    | 31.7                    | 0.99         | G                 | 20.4                      | 19.4                   | 0.82         |
| <b>Chr.2: PKR</b>    |                     |                   |                         |                         |              |                   |                           |                        |              |
| rs2254958            | 37350826            | T                 | 15.3                    | 14.7                    | 0.89         | T                 | 42.7                      | 41.3                   | 0.78         |
| rs2287350            | 37342987            | G                 | 18.4                    | 13.7                    | 0.27         | G                 | 39.3                      | 41.7                   | 0.64         |
| rs2307478            | 37327999            | C                 | 3.1                     | 4.6                     | 0.52         |                   |                           |                        |              |
| rs2307479            | 37337090            | C                 | 11.2                    | 11.5                    | 0.93         | C                 | 1                         | 3.9                    | 0.06         |
| rs2372443            | 37310594            | C                 | 0                       | 2.7                     | 0.1          | C                 | 6.3                       | 2.8                    | 0.11         |
| <b>Chr. 4: IP10</b>  |                     |                   |                         |                         |              |                   |                           |                        |              |
| rs4859584            | 77401532            | G                 | 35.7                    | 33.2                    | 0.65         | G                 | 43.7                      | 46.1                   | 0.63         |
| rs4859587            | 77401691            | A                 | 35.4                    | 33.2                    | 0.7          | A                 | 43.7                      | 46.1                   | 0.63         |
| rs4257674            | 77404080            | A                 | 35.7                    | 33.2                    | 0.65         | A                 | 43.7                      | 46.1                   | 0.63         |
| rs4309862            | 77404376            | A                 | 35.1                    | 33.2                    | 0.74         | A                 | 43.7                      | 46.1                   | 0.64         |
| rs4859591            | 77406973            | G                 | 35.7                    | 33.2                    | 0.65         | G                 | 43.7                      | 46.1                   | 0.63         |
| <b>Chr. 11: IRF7</b> |                     |                   |                         |                         |              |                   |                           |                        |              |

|                       |          |   |      |      |      |   |      |      |      |
|-----------------------|----------|---|------|------|------|---|------|------|------|
| rs12421158            | 600140   | T | 36.5 | 44.3 | 0.19 | C | 35   | 33.3 | 0.74 |
| rs7932167             | 610857   | C | 34.7 | 36.3 | 0.78 | C | 21.8 | 23.9 | 0.63 |
| <b>Chr. 12: STAT2</b> |          |   |      |      |      |   |      |      |      |
| rs2066808             | 55024240 | T | 41.8 | 49.2 | 0.21 | C | 7.8  | 9.4  | 0.56 |
| rs2066807             | 55026949 | C | 0    | 0.8  | 0.39 | C | 6.8  | 9.4  | 0.34 |
| rs2066811             | 55029264 | G | 24.5 | 14.2 | 0.02 | G | 1    | 0    | 0.35 |
| rs2228259             | 55034562 | C | 1    | 0    | 0.1  |   |      |      |      |
| rs2066816             | 55036270 |   |      |      |      |   |      |      |      |
| rs2066819             | 55036471 | A | 0    | 0.8  | 0.39 | A | 7.3  | 9.4  | 0.44 |
| rs11171812            | 55038129 | G | 43.9 | 50.8 | 0.25 | A | 1    | 0    | 0.19 |
| rs4301822             | 55041325 | T | 40.6 | 46.2 | 0.35 | C | 1    | 0    | 0.19 |
| <b>Chr. 12: OAS1</b>  |          |   |      |      |      |   |      |      |      |
| rs4766662             | 1.12E+08 | A | 35.7 | 38.2 | 0.67 | A | 22.3 | 20   | 0.58 |
| rs3741981             | 1.12E+08 | T | 24.5 | 27.1 | 0.62 | C | 42.2 | 38.9 | 0.52 |
| rs2285934             | 1.12E+08 | A | 48   | 42.4 | 0.34 | A | 34.5 | 31.7 | 0.56 |
| rs12298890            | 1.12E+08 | T | 0    | 0.4  | 0.54 |   |      |      |      |
| rs2660                | 1.12E+08 | G | 41   | 8.8  | 0.13 | G | 34   | 31.1 | 0.55 |
| rs6489865             | 1.12E+08 | A | 4.1  | 5.7  | 0.54 | A | 33.5 | 30.6 | 0.54 |
| <b>Chr. 12: OAS3</b>  |          |   |      |      |      |   |      |      |      |
| rs1981557             | 1.12E+08 | C | 9.4  | 6.2  | 0.29 | C | 35.9 | 30   | 0.22 |
| rs6489879             | 1.12E+08 | G | 4.1  | 5.7  | 0.54 | G | 35.9 | 29.4 | 0.18 |
| rs2269899             | 1.12E+08 | G | 26.5 | 26.7 | 0.97 | G | 35   | 28.3 | 0.16 |
| rs2285933             | 1.12E+08 | C | 40.8 | 37   | 0.51 | C | 28.6 | 25.6 | 0.5  |
| rs2107418             | 1.12E+08 | G | 43.9 | 40.5 | 0.56 | G | 44.2 | 45   | 0.87 |
| rs2240189             | 1.12E+08 | T | 16.3 | 17.9 | 0.72 | T | 28.6 | 25   | 0.42 |
| rs757404              | 1.12E+08 | T | 40.8 | 36.6 | 0.47 | T | 29.1 | 25.6 | 0.43 |
| <b>Chr. 12: OAS2</b>  |          |   |      |      |      |   |      |      |      |
| rs2010604             | 1.12E+08 | C | 8.2  | 11.8 | 0.32 | C | 31.1 | 22.8 | 0.07 |
| rs2072138             | 1.12E+08 | C | 22.9 | 24.3 | 0.77 | C | 28.4 | 27.5 | 0.84 |
| rs1293762             | 1.12E+08 | A | 7.1  | 16.8 | 0.02 | A | 44.7 | 44.4 | 0.97 |
| rs1293739             | 1.12E+08 | A | 29.6 | 23.7 | 0.25 | A | 23.8 | 23.9 | 0.98 |
| <b>Chr. 12: OASL</b>  |          |   |      |      |      |   |      |      |      |
| rs1169279             | 1.2E+08  | A | 34.7 | 32.8 | 0.74 | A | 40.8 | 31.1 | 0.05 |

1  
2  
3  
4  
5  
6  
7  
8  
9  
10  
11  
12  
13  
14  
15  
16  
17  
18  
19  
20  
21  
22  
23  
24  
25  
26  
27  
28  
29  
30  
31  
32  
33  
34  
35  
36  
37  
38  
39  
40  
41  
42  
43  
44  
45  
46  
47  
48  
49

|                        |          |   |      |      |      |   |      |      |      |  |
|------------------------|----------|---|------|------|------|---|------|------|------|--|
| rs2260399              | 1.2E+08  | T | 38.8 | 34.4 | 0.44 | C | 48.5 | 51.7 | 0.54 |  |
| rs3213545              | 1.2E+08  | T | 19.4 | 14.9 | 0.3  | T | 35.4 | 26.4 | 0.06 |  |
| rs10849832             | 1.2E+08  | C | 22.5 | 21.4 | 0.83 | C | 14.6 | 10.6 | 0.24 |  |
| <b>Chr. 14: IRF9</b>   |          |   |      |      |      |   |      |      |      |  |
| rs4981494              | 22620219 | G | 34.7 | 29   | 0.3  | G | 29.6 | 30   | 0.93 |  |
| rs2236350              | 22621138 | T | 5.1  | 2.3  | 0.17 | T | 8.3  | 9.4  | 0.68 |  |
| rs12432194             | 22626153 | T | 10.2 | 9.5  | 0.85 | T | 17.5 | 15   | 0.51 |  |
| <b>Chr. 17: IFI35</b>  |          |   |      |      |      |   |      |      |      |  |
| rs8076790              | 41527765 | C | 33.7 | 34.4 | 0.9  | C | 18   | 19.4 | 0.71 |  |
| rs692692               | 41528451 | A | 28.6 | 26.7 | 0.73 | A | 18   | 18.8 | 0.96 |  |
| rs10840                | 41539582 | A | 18.4 | 22.5 | 0.39 | A | 8.7  | 8.3  | 0.89 |  |
| rs455055               | 41541122 | T | 36.5 | 30.2 | 0.26 | G | 25.3 | 27.2 | 0.66 |  |
| <b>Chr. 21: IFNAR2</b> |          |   |      |      |      |   |      |      |      |  |
| rs1476415              | 33518781 | C | 46.9 | 44.3 | 0.65 | A | 47.1 | 46.1 | 0.85 |  |
| rs9636866              | 33520288 | C | 32.7 | 32.8 | 0.98 | C | 22.8 | 19.4 | 0.42 |  |
| rs2300370              | 33524953 | A | 23.5 | 21.8 | 0.73 | A | 30.1 | 33.9 | 0.43 |  |
| rs2248420              | 33526174 | T | 15.3 | 14.5 | 0.85 | T | 26.7 | 32   | 0.25 |  |
| rs4986956              | 33534646 | C | 4.1  | 6.9  | 0.33 | C | 5.3  | 7.2  | 0.45 |  |
| rs2252650              | 33538346 | A | 27.6 | 26   | 0.76 | A | 29.6 | 33.9 | 0.37 |  |
| rs2834165              | 33542932 | G | 48   | 48.9 | 0.88 | A | 48.1 | 46.7 | 0.79 |  |
| rs2834166              | 33547050 | A | 18.4 | 20.2 | 0.69 | A | 39.3 | 28.9 | 0.03 |  |
| rs2250226              | 33552712 | A | 41.8 | 45.4 | 0.54 | G | 30.6 | 33.3 | 0.56 |  |
| rs2834167              | 33561184 | G | 18.4 | 14.9 | 0.42 | G | 24.3 | 22.8 | 0.73 |  |
| <b>Chr. 21: IFNAR1</b> |          |   |      |      |      |   |      |      |      |  |
| rs2834190              | 33613407 | T | 11.5 | 10   | 0.69 | T | 26.7 | 31.1 | 0.34 |  |
| rs2856968              | 33618377 | G | 42.9 | 36.3 | 0.25 | G | 40.3 | 36.1 | 0.4  |  |
| rs2252930              | 33624597 | G | 11.2 | 1.3  | 0.8  | G | 26.7 | 31.1 | 0.34 |  |
| rs2243592              | 33628204 | G | 42.9 | 36.3 | 0.25 | G | 40.3 | 36.1 | 0.4  |  |
| rs2253923              | 33632815 | T | 42.9 | 35.9 | 0.22 | T | 39.3 | 35.6 | 0.45 |  |
| rs2257167              | 33636095 | C | 16.3 | 21   | 0.32 | C | 14.6 | 10.7 | 0.26 |  |
| rs2834195              | 33640709 | A | 6.1  | 3.8  | 0.35 | A | 0.5  | 0    | 0.35 |  |
| rs2243599              | 33643890 | T | 29.6 | 33.6 | 0.47 | G | 40.3 | 36.7 | 0.47 |  |
| rs1041868              | 33647726 | A | 22.5 | 22.7 | 0.96 | A | 18.5 | 13.9 | 0.23 |  |

|                     |          |   |      |      |      |   |      |      |      |  |
|---------------------|----------|---|------|------|------|---|------|------|------|--|
| rs2834202           | 33651350 | G | 26.5 | 16.8 | 0.04 | G | 24.8 | 24.4 | 0.94 |  |
| <b>Chr. 21: MX2</b> |          |   |      |      |      |   |      |      |      |  |
| rs757368            | 41649987 | G | 39.8 | 47   | 0.23 | G | 13.6 | 16.1 | 0.49 |  |
| rs2838029           | 41656115 | A | 45.9 | 45.4 | 0.93 | A | 12.1 | 15   | 0.41 |  |
| rs443099            | 41663723 | T | 23.5 | 18.3 | 0.28 | G | 39.3 | 38.3 | 0.84 |  |
| rs9305739           | 41679106 | C | 15.3 | 22.5 | 0.13 | C | 4.9  | 3.3  | 0.46 |  |
| rs369908            | 41687529 | A | 23.5 | 24.2 | 0.88 | G | 21.4 | 17.2 | 0.31 |  |
| rs8126663           | 41703444 | T | 44.9 | 43.1 | 0.76 | T | 21.8 | 15   | 0.09 |  |
| <b>Chr. 21: MX1</b> |          |   |      |      |      |   |      |      |      |  |
| rs17000900          | 41718426 | A | 23.4 | 23.1 | 0.95 | A | 10.8 | 10.6 | 0.94 |  |
| rs455816            | 41725429 | G | 16.3 | 17.2 | 0.85 | G | 46.6 | 50.6 | 0.44 |  |
| rs456298            | 41757147 | T | 37.5 | 37.8 | 0.96 | T | 14.4 | 12.2 | 0.53 |  |
| rs462903            | 41718002 | G | 14.3 | 14.5 | 0.96 | G | 41.8 | 43.9 | 0.68 |  |
| rs469390            | 41738326 | A | 42.9 | 47.7 | 0.41 | G | 38.5 | 41.1 | 0.6  |  |

# allele frequency among SVR or NR

\* chi-square test

**Supplemental table 3. Selected possible potential functional SNP in the *OASL* gene and allele frequency of association analysis of SVR and selected SNPs**

| SNP ID      | Location        | Nucleotide change | Potential function       | African American |                |                     |         |                 | Caucasian American |                |                     |         |                   |
|-------------|-----------------|-------------------|--------------------------|------------------|----------------|---------------------|---------|-----------------|--------------------|----------------|---------------------|---------|-------------------|
|             |                 |                   |                          | N                | Variant allele | Variant allele N(%) | p-value | RR (95%CI)      | N                  | Variant allele | Variant allele N(%) | p-value | RR (95%CI)        |
| rs7134069   | promoter region | A-4606C           | C/EBPb binding site      | 358              | C              | 75(20.9)            | 0.47    | 1.16(0.78-1.71) | 388                | C              | 17(4.4)             | 0.96    | 0.99(0.62-1.56)   |
| rs2859398   | promoter region | C- 2875T          | C/EBPb binding site      | 360              | C              | 67(18.6)            | 0.82    | 1.05(0.69-1.61) | 388                | C              | 142(36.6)           | 0.04    | 1.22(1.02-1.47)   |
| rs2859394   | promoter region | C- 2485T          | GATA1 binding site       | 358              | C              | 39(10.9)            | 0.61    | 1.14(0.69-1.89) | 386                | C              | 60(15.5)            | 0.995   | 0.999 (0.77-1.29) |
| rs10849833  | promoter region | A-1250G           | E47 and USF binding site | 360              | A              | 77(21.4)            | 0.76    | 1.06(0.71-1.59) | 388                | A              | 18(4.6)             | 0.87    | 1.04(0.68-1.59)   |
| rs12315068  | promoter region | A-736G            | SP1 binding site         | 358              |                |                     |         |                 | 388                |                |                     |         |                   |
| rs10849832* | intron 1        | C657T             |                          | 360              | C              | 78(21.7)            | 0.83    | 1.05(0.70-1.57) | 386                | C              | 49(12.7)            | 0.24    | 1.17(0.92-1.50)   |
| rs28360476  | extron 2        | T5249G            | synonymous               | 356              |                |                     |         |                 | 388                |                |                     |         |                   |
| rs3213545*  | extron 2        | C5444T            | synonymous               | 360              | T              | 58(16.1)            | 0.30    | 1.25(0.83-1.90) | 384                | T              | 120(31.3)           | 0.06    | 1.21(1.002-1.46)  |
| rs3213546   | intron 2        | C5565G            | Conserved region         | 360              | C              | 61(16.9)            | 0.61    | 0.89(0.55-1.43) | 388                | C              | 11(2.8)             | 0.95    | 1.02(0.59-1.76)   |
| rs10849829  | intron 2        | A6525G            | Conserved region         | 360              | A              | 128(35.6)           | 0.44    | 1.15(0.81-1.62) | 388                | G              | 192(49.5)           | 0.42    | 0.93(0.77-1.12)   |
| rs2260399*  | intron 2        | C7128T            |                          | 360              | T              | 128(35.6)           | 0.44    | 1.15(0.81-1.62) | 386                | C              | 193(50.0)           | 0.54    | 0.94(0.78-1.14)   |
| rs7969180   | extron 4        | A11280G           | synonymous               | 360              | A              | 4(1.1)              | 0.92    | 0.92(0.17-5.05) | 386                |                |                     |         |                   |
| rs11307154  | intron 4        | -11670A           | Conserved region         | 358              | -              | 177(49.4)           | 0.40    | 1.16(0.82,1.63) | 388                | A              | 85(21.9)            | 0.70    | 0.96(0.76,1.20)   |
| rs3861793   | extron 6        | C18300G           | synonymous               | 352              |                |                     |         |                 | 388                |                |                     |         |                   |

|            |                   |         |                          |     |   |           |      |                 |     |   |           |       |                 |
|------------|-------------------|---------|--------------------------|-----|---|-----------|------|-----------------|-----|---|-----------|-------|-----------------|
| rs12819210 | extron 6          | T18311C | synonymous               | 360 | T | 20(5.6)   | 0.77 | 1.11(0.56-2.21) | 388 | T | 77(19.8)  | 0.74  | 0.96(0.76-1.22) |
| rs2259697  | 3-UTR             | C18643T | 3 end untranslate region | 360 | C | 135(37.5) | 0.76 | 1.06(0.75-1.49) | 388 | C | 79(20.4)  | 0.55  | 0.93(0.73-1.18) |
| rs1169279* | 3 end down stream | A18381G |                          | 360 | A | 120(33.3) | 0.74 | 1.06(0.75-1.51) | 386 | A | 140(36.3) | 0.049 | 1.21(1.01-1.46) |
| rs7134141  | 3 end down stream | A19708G | Conserved region         | 358 | A | 53(14.8)  | 0.40 | 0.80(0.47-1.36) | 388 | A | 10(2.6)   | 0.68  | 1.12(0.67-1.88) |

---

\* SNPs were typed in stage I

1  
2  
3  
4  
5  
6  
7  
8  
9  
10  
11  
12  
13  
14  
15  
16  
17  
18  
19  
20  
21  
22  
23  
24  
25  
26  
27  
28  
29  
30  
31  
32  
33  
34  
35  
36  
37  
38  
39  
40  
41  
42  
43  
44  
45  
46  
47  
48  
49  
50  
51  
52  
53  
54  
55  
56  
57  
58  
59  
60

**Supplemental table 4. Linkage disequilibrium among the 3 SNPs in OASL**

| CA        | rs1169279 | rs3213545 | rs2859398 |
|-----------|-----------|-----------|-----------|
| rs1169279 |           | 0.97      | 0.68      |
| rs3213545 | 0.75      |           | 0.8       |
| rs2859398 | 0.46      | 0.5       |           |

  

| AA        | rs1169279 | rs3213545 | rs2859398 |
|-----------|-----------|-----------|-----------|
| rs1169279 |           | 0.59      | 0.5       |
| rs3213545 | 0.13      |           | 0.96      |
| rs2859398 | 0.12      | 0.77      |           |

Upper triangle for D'  
Lower triangle for r<sup>2</sup>



1  
2  
3  
4  
5  
6  
7  
8  
9  
10  
11  
12  
13  
14  
15  
16  
17  
18  
19  
20  
21  
22  
23  
24  
25  
26  
27  
28  
29  
30  
31  
32  
33  
34  
35  
36  
37  
38  
39  
40  
41  
42  
43  
44  
45  
46  
47  
48  
49  
50  
51  
52  
53  
54  
55  
56  
57  
58  
59  
60
